# Supplementary material for: Towards Continuous Primary Manufacturing Processes—Particle Design through Combined Crystallization and Particle Isolation
Source: MDPI journal article supplement (doi:10.3390/pr9122187), 2021-12-03
Supplement: s1 [file s1]

Supporting Information

# Towards Continuous Primary Manufacturing Processes – Particle Design through combined Crystallization and Particle Isolation

Claas Steenweg <sup>1</sup>, Anne Cathrine Kufner <sup>1</sup>, Jonas Habicht <sup>1</sup>, and Kerstin Wohlgemuth <sup>1</sup>

Table S1: Operating parameters of the integrated process (SFC & CVSF).

| Parameter                                    | CP-Q1.1 | CP-Q1.2 | CP-Q2.1 | CP-Q2.2 |
|----------------------------------------------|---------|---------|---------|---------|
| $Q_{\text{tot}}$ [mL min <sup>-1</sup> ]     | 20      | 20      | 40      | 40      |
| $Q_{\text{susp}}$ [mL min <sup>-1</sup> ]    | 10      | 10      | 20      | 20      |
| $\epsilon_{L,0}$ [-]                         | 0.5     | 0.5     | 0.5     | 0.5     |
| $\tau_{\text{SFC}}$ [min]                    | 10      | 10      | 5       | 5       |
| $\vartheta_{\text{SFC,IN}}$ [°C]             | 50      | 50      | 50      | 50      |
| $\vartheta_{\text{SFC,OUT}}$ [°C]            | 30      | 30      | 30      | 30      |
| $L_{\text{tubing}}$ [m]                      | 26      | 26      | 26      | 26      |
| $d_{i,\text{tubing}}$ [mm]                   | 3.18    | 3.18    | 3.18    | 3.18    |
| $\bar{\kappa}$ [K min <sup>-1</sup> ]        | 1.8     | 1.8     | 3.6     | 3.6     |
| $W_s$ [g <sub>solid</sub> g <sub>sol</sub> ] | 0.050   |         | 0.056   |         |
| $\alpha$ [-]                                 | 0.210   |         | 0.119   |         |
| $n_{\text{screw}}$ [rpm]                     | 2       | 2       | 2       | 2       |
| $N_{\text{fil}}$ [-]                         | 1       | 1       | 1       | 1       |
| $n_{\text{VP}}$ [hz]                         | 26.4    | 26.4    | 26.4    | 26.4    |
| $\Delta p_{\text{set}}$ [mbar]               | 400     | 400     | 400     | 400     |
| $N_{\text{wash}}$ [-]                        | 2       | 2       | 2       | 2       |
| $Q_{\text{wash}}$ [mL min <sup>-1</sup> ]    | 25      | 25      | 25      | 25      |
| $\tau_{\text{id,CVSF}}$ [min]                | 15      | 15      | 15      | 15      |

Table S2: Results of the integrated process (SFC & CVSF)

| Parameter                 |            | CP-Q1.1 | CP-Q1.2 | CP-Q2.1 | CP-Q2.2 |
|---------------------------|------------|---------|---------|---------|---------|
| $d_{50,3}$ [μm]           | Seeds      | 215.3   | 215.3   | 215.3   | 215.3   |
|                           | After SFC  | 436.3   | 447.3   | 416.6   | 450.8   |
|                           | After CVSF | 387.9   | 419.3   | 382.7   | 423.4   |
| $d_{90,3-10,3}$ [μm]      | Seeds      | 109.2   | 109.2   | 109.2   | 109.2   |
|                           | After SFC  | 295.9   | 312.0   | 311.8   | 343.2   |
|                           | After CVSF | 288.9   | 415.7   | 296.3   | 324.2   |
| $Ag_0$ [-]                | Seeds      | 0.57    | 0.57    | 0.57    | 0.57    |
|                           | After SFC  | 0.77    | 0.73    | 0.72    | 0.75    |
|                           | After CVSF | 0.52    | 0.52    | 0.60    | 0.71    |
| $n_{\text{part,tot}}$ [-] | Seeds      | 9051    | 9051    | 9051    | 9051    |
|                           | After SFC  | 1440    | 5698    | 2780    | 1856    |
|                           | After CVSF | 2722    | 1142    | 13450   | 6445    |
| $Y_{\text{rel}}$ [%]      |            | 70.0    | 67.9    | 48.5    | 40.6    |
| $RM_{\text{ML}}$ [%]      |            | 1.1     | 2.1     | 1.93    | 6.05    |



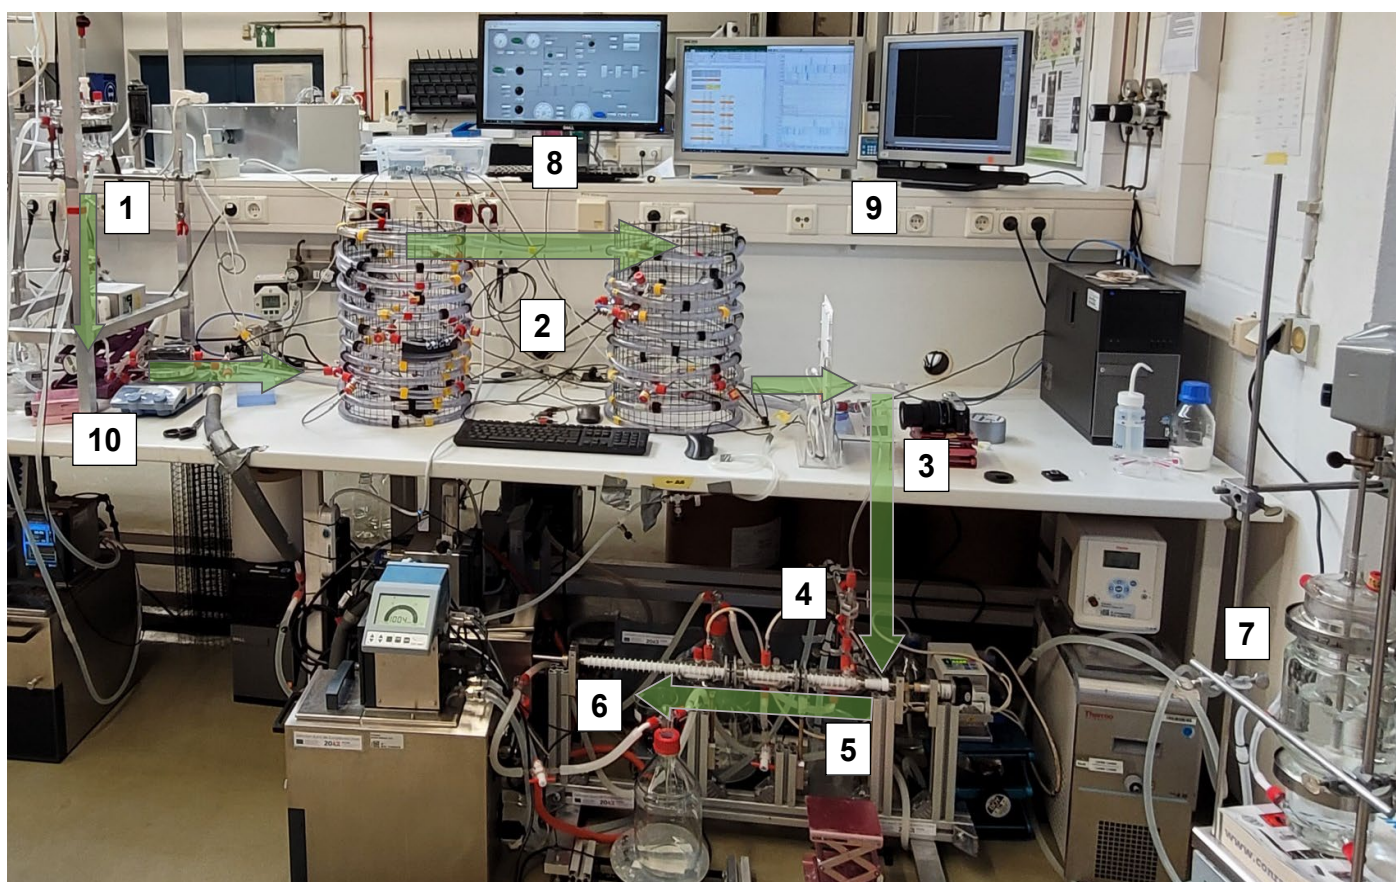

Figure S1: Experimental setup of the integrated process. The material flow is indicated in green arrows. 1: Seed crystal vessel, 2: SFC, 3: connecting element, 4: tube-in-tube heater, 5: CVSF, 6: Filter cake discharge, 7: QICPIC-sample vessel, 8: Control system (CVSF), 9: Control system (SFC)
